# Supplementary material for: The Association between Metabolic Syndrome, Bone Mineral Density, Hip Bone Geometry and Fracture Risk: The Rotterdam Study
Source: PubMed Central journal article supplement (PMC4466576; doi:10.1371/journal.pone.0129116), 2015-06-12

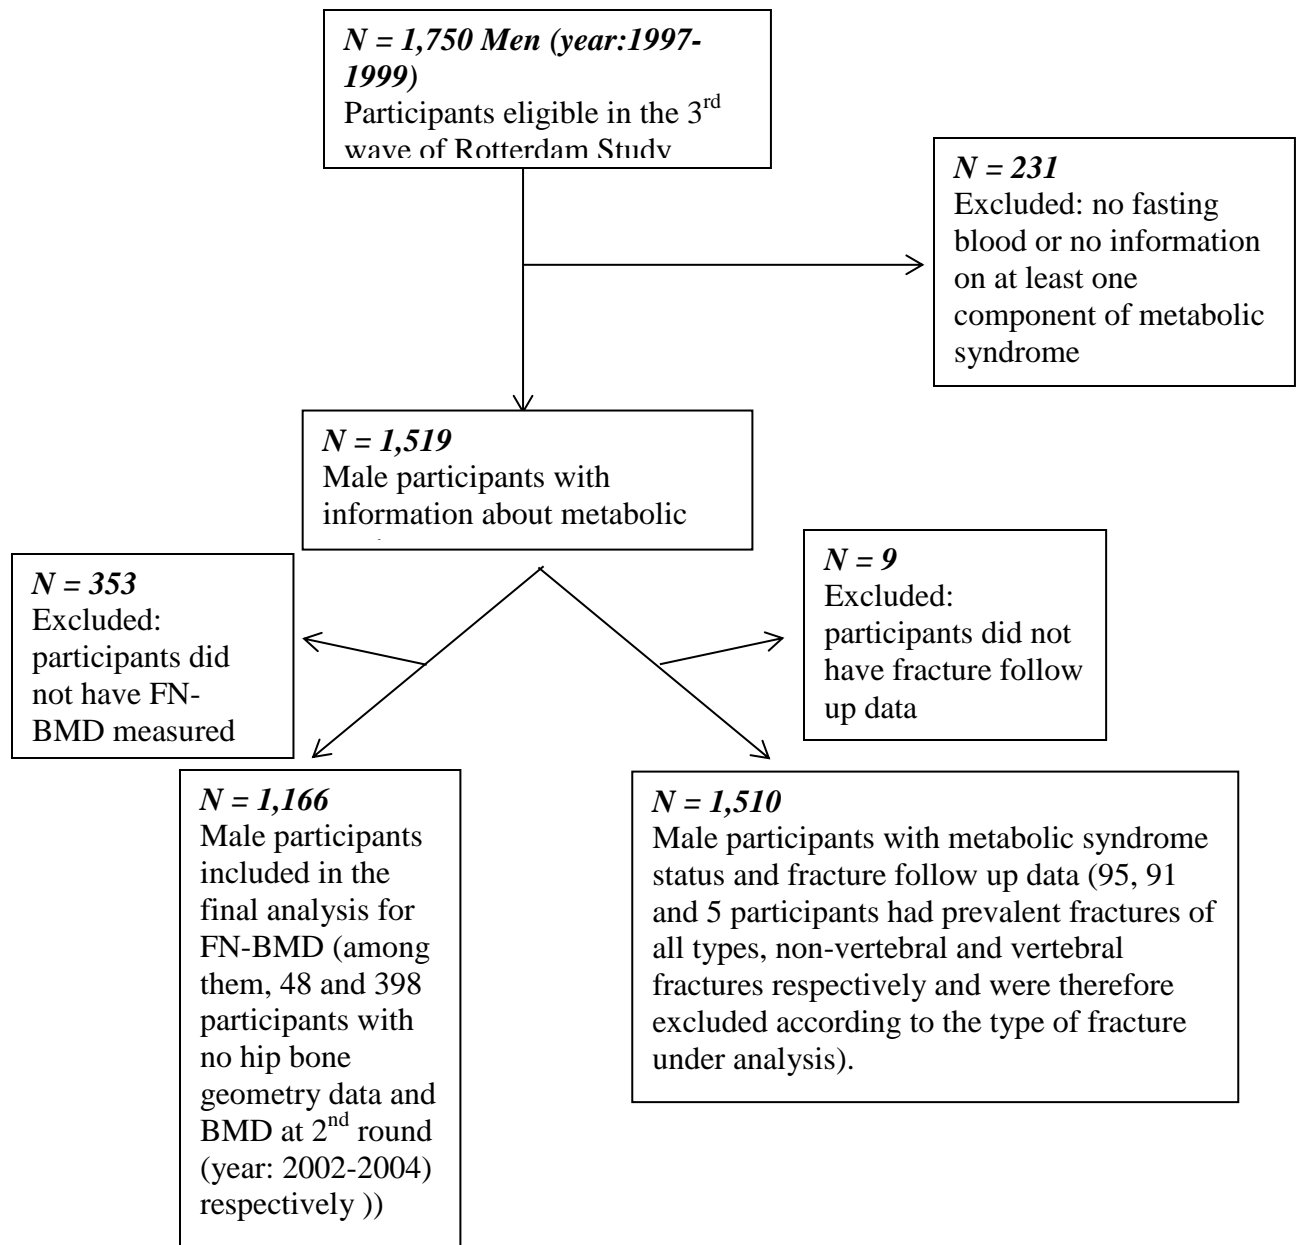

Supplement: pone.0129116.s002.pdf [file pone.0129116.s002.pdf]
